# Supplementary material
Source: MDPI journal article supplement (https://www.mdpi.com/2311-7524/5/1/13)
Supplement: s1 [file s1]

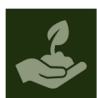

# Evaluation of Two Wild Populations of Hedge Mustard (*Sisymbrium officinale* (L.) Scop.) as a Potential Leafy Vegetable

Marta Guarise <sup>1,\*</sup>, Gigliola Borgonovo <sup>2</sup>, Angela Bassoli <sup>2</sup> and Antonio Ferrante <sup>1</sup>

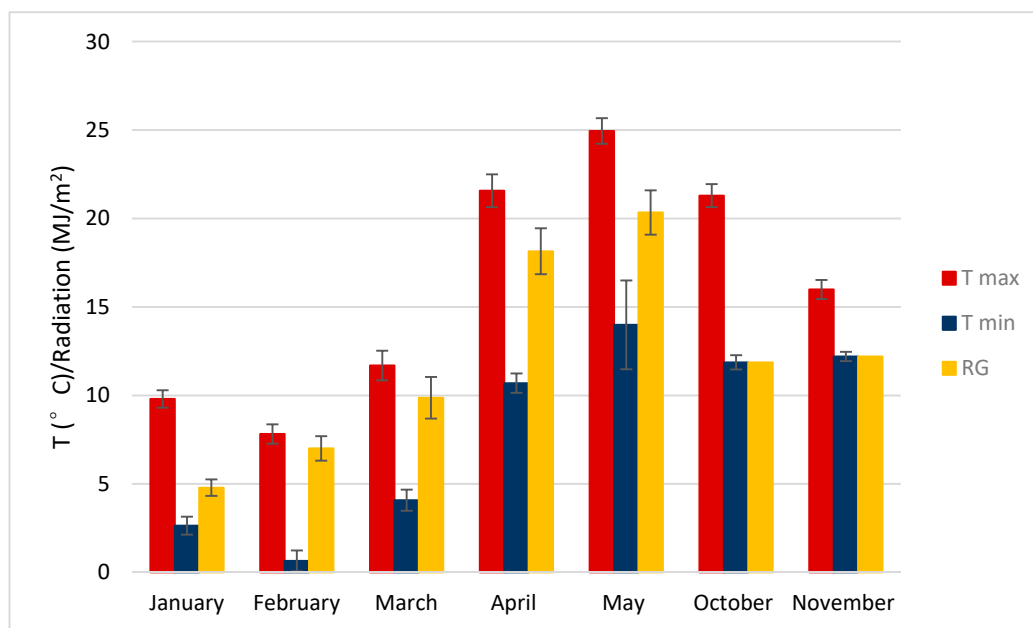

**Figure S1.** Temperature minimum and maximum and solar radiation (RG) during the cultivation period.

A table with all the temporal information has been added to better explain the two cultivation cycles.

**Table S1.** Cultivation period including sowing, transplanting, sampling, and harvest time.

| Cultivation cycle | Sowing                        | Transplant                    | Samples                               | Harvest                       |
|-------------------|-------------------------------|-------------------------------|---------------------------------------|-------------------------------|
| 1°                | 16 <sup>th</sup> January 2018 | 19 <sup>th</sup> March 2018   | 18 <sup>th</sup> April and 3 May 2018 | 3 May 2018                    |
| 2°                | 8 <sup>th</sup> October 2018  | 18 <sup>th</sup> October 2018 | 7 <sup>th</sup> November 2018         | 7 <sup>th</sup> November 2018 |
